# Supplementary material
Source: PubMed Central journal article supplement (PMC6800796)
Supplement: NIHMS1043213-supplement-Supp_info.pdf [file NIHMS1043213-supplement-Supp_info.pdf]

## Supplemental Information

### Contents

**Supplemental Figure 1.** R-loop ChIP levels with *garP* mutations

**Supplemental Figure 2.** *rnhB* does not affect pilus dependent colony morphology changes

**Supplemental Figure 3.** R-loop ChIP controls

**Supplemental Figure 4.** G4 ChIP Controls

**Supplemental Figure 5.** Silent copy choice for pilin Av events detected using PacBio and SwitchAmp.

**Supplemental Figure 6.** Silent copy choice during different levels of *rnhA* expression

**Supplemental Table 1.** Pilin Av frequencies by the PacBio Assay

**Supplemental Table 2.** PacBio samples numbers

**Supplemental Table 3.** Strains used in this study

**Supplemental Table 4.** Primers used in this study

**Supplemental Table 5.** Primers used for PacBio Sequencing

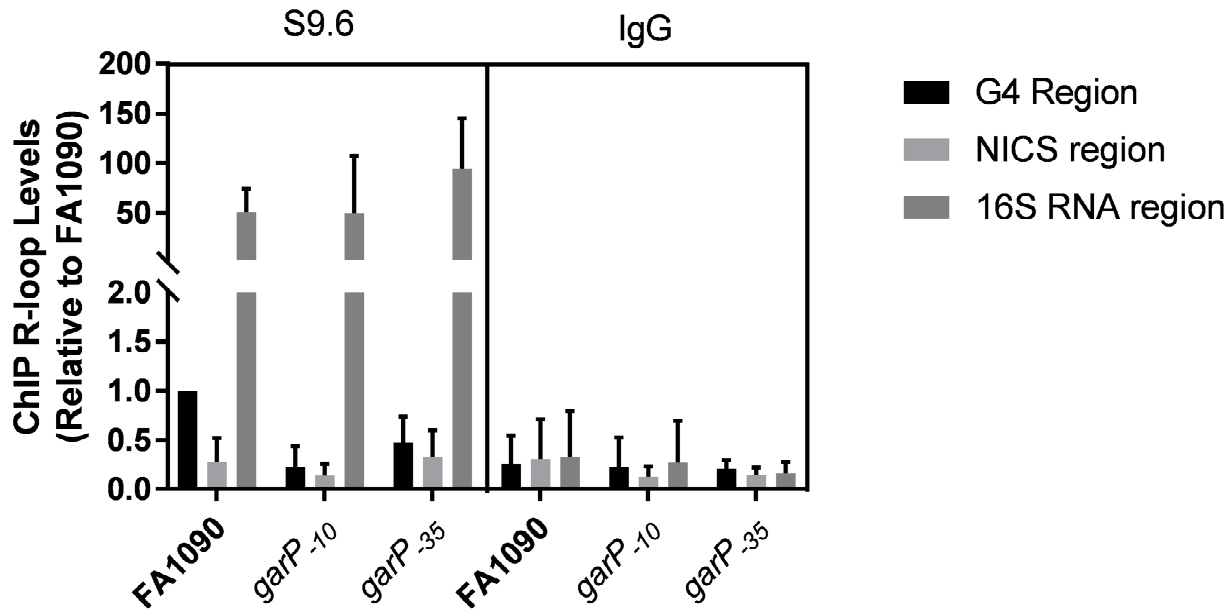

**Supplemental Figure 1.** R-loop ChIP levels with *garP* mutations

Graphs represents the same data as Figure 2A, but the negative and positive controls are also included. The ectopic region is a low transcription region of the genome and ChIP signal detects general genomic DNA pulled down by the S9.6 antibody and 16S RNA region is a region of high transcription so this is a positive control for R-loop pull down for each experiment. A nonspecific IgG Ab indicates the general DNA pulled down by a nonspecific antibody.

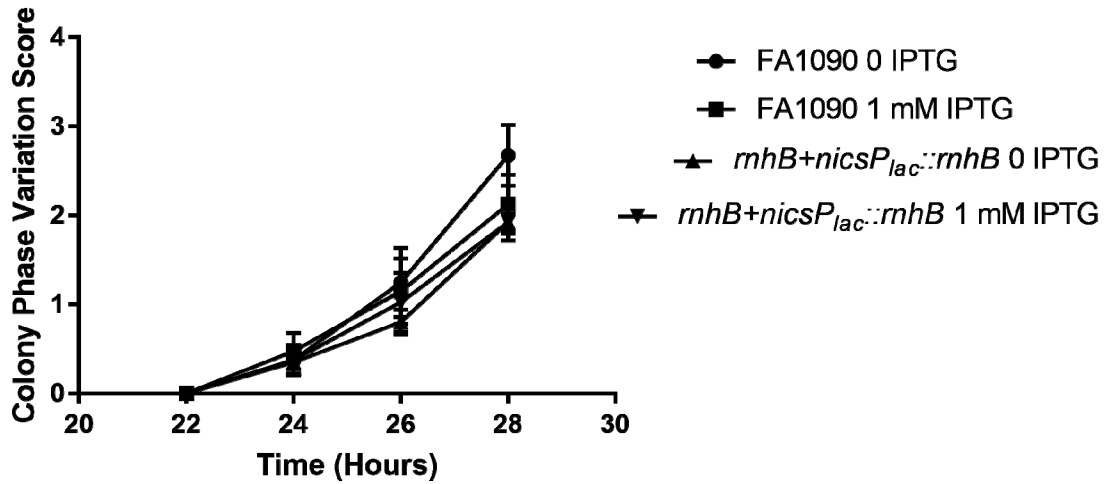

**Supplemental Figure 2.** *rnhB* does not affect pilus dependent colony morphology changes

Phase variation of FA1090 and *rnhB+nicsP<sub>lac</sub>::rnhB* was determined using the PDCMC assay with and without 1 mM IPTG. The average of 4 biological replicates with standard deviation is graphed.

Supplemental Figure 3.

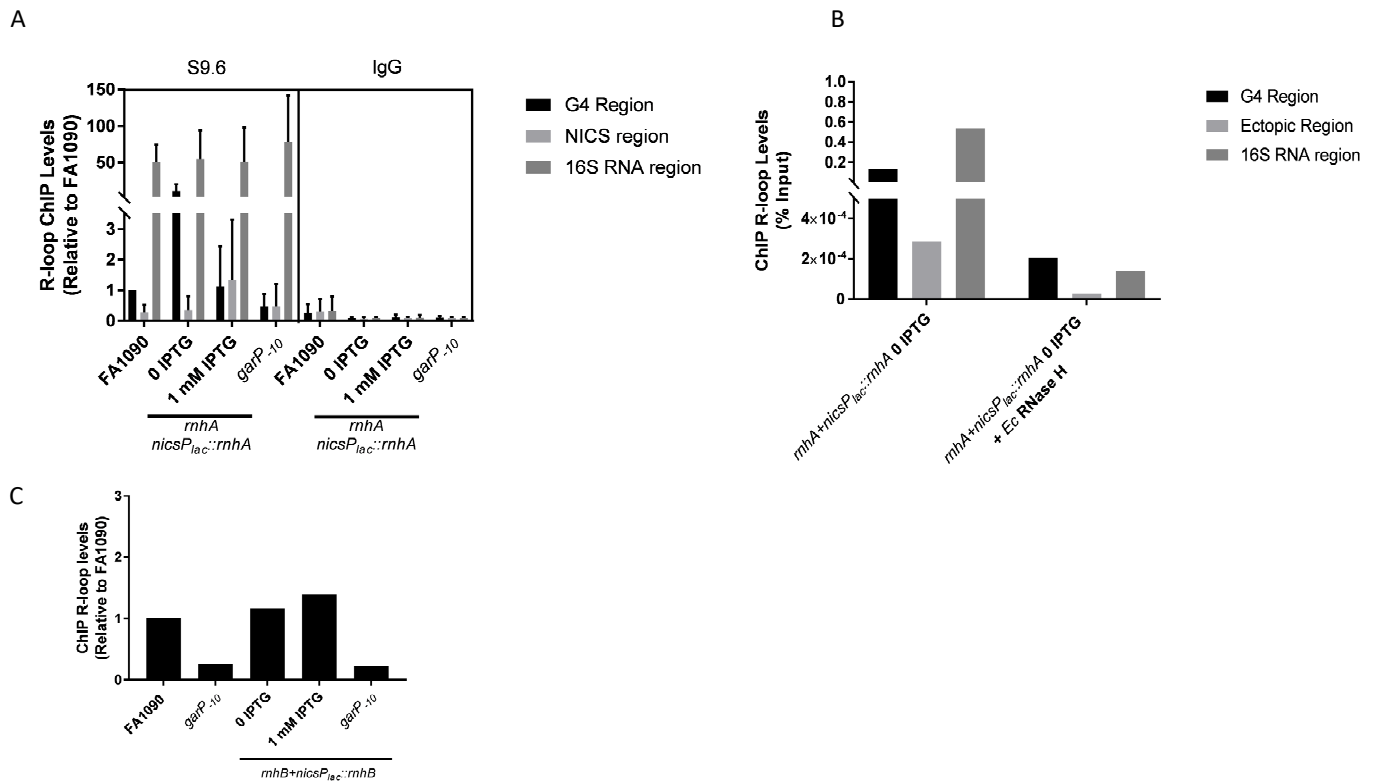

**Supplemental Figure 3. R-loop ChIP controls**

- Graphs represents the same data as 2C but negative and positive controls are also included. The ectopic region is a low transcription region of the genome and ChIP signal detects general genomic DNA pulled down by the S9.6 antibody and 16S RNA region is a region of high transcription so this is a positive control for R-loop pull down for each experiment. A nonspecific IgG Ab indicates the general DNA pulled down by a nonspecific antibody.
- R-loop ChIP was performed on *rnhA+nicsP<sub>lac</sub>::rnhA* 0 IPTG. The DNA bound to S9.6 was treated with *E. coli* RNase H before washing (50). The resulting DNA was purified and % Input calculated. Average of two experiments is graphed. The on bead treatment with purified RNase H should remove the R-loop signal indicating the S9.6 antibody is detecting RNA:DNA hybrids.
- R-loop ChIP was used to determine the level of R-loops in *rnhB+nicsP<sub>lac</sub>::rnhB* with and without the addition of IPTG. The average of two experiments is graphed. The range for *rnhB+nicsP<sub>lac</sub>::rnhB* 0 IPTG was 0.2-2, 1 mM IPTG 0.6-2.2 and the *rnhB+nicsP<sub>lac</sub>::rnhB garP<sub>-10</sub>* 0.04-0.4 fold.

Supplemental Figure 4.

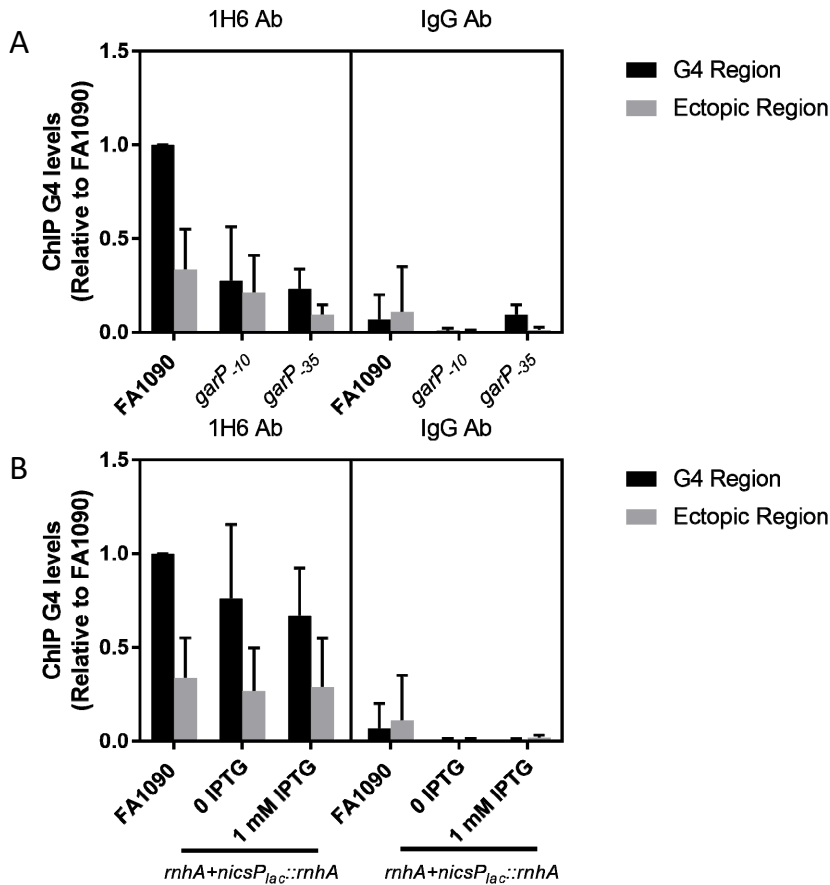

#### Supplemental Figure 4. G4 ChIP Controls

- G4 levels were determined using G4 ChIP on *garP<sub>-10</sub>* and *garP<sub>-35</sub>* with the G4 specific Ab, 1H6. Relative G4 levels are calculated by determining the % input after ChIP pulldown for each sample and the dividing by the % input of FA1090. Graph represents the same data as Figure 4A. The ectopic region is a low transcription region of the genome and ChIP signal detects general genomic DNA pulled down by the antibody. A nonspecific IgG Ab indicates the general DNA pulled down by a nonspecific antibody.
- G4 ChIP was used to determine G4 levels under low *rnhA* and high *rnhA* expression (*rnhA+nicsP<sub>lac</sub>::rnhA* 0 IPTG, and *rnhA+nicsP<sub>lac</sub>::rnhA* 1 mM IPTG). The data is the same as Figure 4B. The controls are the same as described in part A.

Supplemental Figure 5.

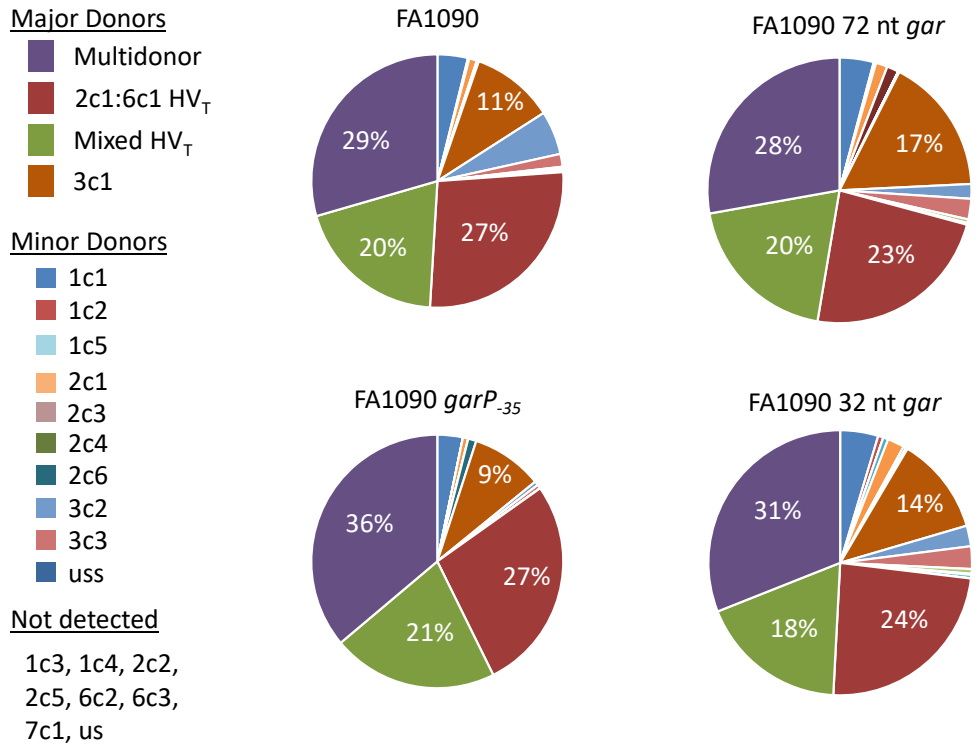

**Supplemental Figure 5.** Silent copy choice for pilin Av events detected using PacBio and SwitchAmp.

The two biological replicates were pooled and all the silent copies chosen for each pilin Av counted. There are four common silent copy choices seen in the samples. The tail sequence of silent copies 2c1 and 6c1 (2c1:6c1 HV<sub>T</sub>) replaced the *pilE* sequence in many samples, similar to previously published results (Criss *et al.*, 2005, Rotman *et al.*, 2016). We also observed a mosaic sequence containing both 1-81-S2 and the 2c1:6c1 tail sequence that was not observed in the negative control strains. Additionally, the use of silent copy 3c1 was common among all the strains. Finally, the fourth choice was multivariant, where the change way common to multiple silent copies so a single donor cannot be identified (Ozer, *et al.* 2019).

Major Donors

- Multidonor
- 2c1:6c1 HV<sub>T</sub>
- Mixed HV<sub>T</sub>
- 3c1

Minor Donors

- 1c1
- 1c2
- 1c5
- 2c1
- 2c2
- 2c3
- 2c4
- 2c6
- 3c2
- 3c3
- 6c1
- 6c2
- 6c3
- uss

Not detected

- 1c3, 1c4, 2c4,
- 2c5, 7c1

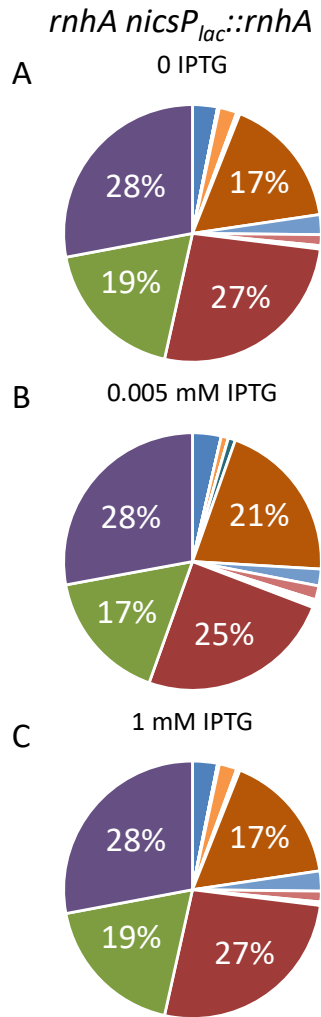

**Supplemental Figure 6.** Silent copy choice during different levels of *rnhA* expression

The silent copy choice was examined for *rnhA+nicsP<sub>lac</sub>::rnhA* with 0, 0.005 and 1 mM IPTG from the two biological replicates. The four common silent copy choices were similar to Supplemental Figure 5.

| Strain                                                                     | Pool A |       | Pool B |       |
|----------------------------------------------------------------------------|--------|-------|--------|-------|
|                                                                            | % Av   | Reads | %Av    | Reads |
| FA1090                                                                     | 17.61  | 7296  | 16.9   | 5396  |
| FA1090 G4 Mutant                                                           | 0.21   | 7252  | ND     | ND    |
| FA1090 <i>garP</i> <sub>-10</sub>                                          | 0.1    | 4707  | ND     | ND    |
| FA1090 <i>garP</i> <sub>-35</sub>                                          | 6.13   | 4522  | 5.73   | 4434  |
| FA1090 72 nucleotide <i>gar</i>                                            | 17.60  | 6018  | 13.7   | 6312  |
| FA1090 32 nucleotide <i>gar</i>                                            | 16.35  | 7164  | 16.75  | 6873  |
| <i>rnhA+nicsP</i> <sub>LAC</sub> :: <i>rnhA</i> 0 IPTG                     | 11.9   | 7667  | 7.38   | 5327  |
| <i>rnhA+nicsP</i> <sub>LAC</sub> :: <i>rnhA</i> 0.005 mM IPTG              | 12.6   | 6098  | 13.9   | 7290  |
| <i>rnhA+nicsP</i> <sub>LAC</sub> :: <i>rnhA</i> 1 mM IPTG                  | 12.8   | 6297  | 12.3   | 5039  |
| <i>rnhA+nicsP</i> <sub>LAC</sub> :: <i>rnhA garP</i> <sub>-10</sub> 0 IPTG | 0.19   | 8965  | ND     | ND    |

**Supplemental Table 1.** Pilin Av frequencies by the PacBio Assay

Each strain that can undergo pilin Av was tested with biological replicates. The pool of both replicates for each sample are shown in Table 1. This table contains the individual values of each pool separately, and includes the number of reads for each pool. The Av frequency was determined by dividing the number of variant reads by the total number of reads per barcoded sample. ND-not determined



Supplemental Table 2.

| Sample name          | Condition                                                  | Rep # | Library ID | SRA accession | BioSample accession | # Reads | # Bases | Mean read length |
|----------------------|------------------------------------------------------------|-------|------------|---------------|---------------------|---------|---------|------------------|
| 35mutFA_22h_a        | FA1090 garP-35                                             | 1     | 33a        | SRR9670522    | SAMN12255025        | 5972    | 4717392 | 789.92           |
| 35mutFA_22h_b        | FA1090 garP-35                                             | 2     | 33b        | SRR9670511    | SAMN12255041        | 6011    | 4577275 | 761.48           |
| FA-10mut_22h         | FA1090 garP-10 22 hrs                                      |       | 31b        | SRR9670517    | SAMN12255039        | 6015    | 4759857 | 791.33           |
| FA1090_22h_a         | FA1090 grown for 22 hrs                                    | 1     | 1a         | SRR9670503    | SAMN12255012        | 10842   | 8628492 | 795.84           |
| FA1090_22h_b         | FA1090 grown for 22 hrs                                    | 2     | 1b         | SRR9670527    | SAMN12255026        | 8690    | 6941742 | 798.82           |
| G4mutFA1090_22h      | FA1090 G4 mutant 22 hrs                                    |       | 23b        | SRR9670514    | SAMN12255034        | 8757    | 6925157 | 790.81           |
| endterm_22h_a        | FA1090 32 nt gar 22 hrs                                    | 1     | 18a        | SRR9670505    | SAMN12255018        | 10625   | 8392303 | 789.86           |
| endterm_22h_b        | FA1090 32 nt gar 22 hrs                                    | 2     | 18b        | SRR9670516    | SAMN12255032        | 10449   | 8284712 | 792.87           |
| 116term_22h_a        | FA1090 72 nt gar 22 hrs                                    | 1     | 17a        | SRR9670508    | SAMN12255017        | 10597   | 8436107 | 796.08           |
| 116term_22h_b        | FA1090 72 nt gar 22 hrs                                    | 2     | 17b        | SRR9670530    | SAMN12255031        | 10387   | 8307828 | 799.83           |
| delA+A_32h_a         | FA1090<br>rnhA+nicsPlac::rnhA 0 mM<br>IPTG 32 hrs          | 1     | 8a         | SRR9670507    | SAMN12255016        | 10576   | 8403174 | 794.55           |
| delA+A_32h_b         | FA1090<br>rnhA+nicsPlac::rnhA 0 mM<br>IPTG 32 hrs          | 2     | 7b         | SRR9670526    | SAMN12255029        | 7387    | 5698879 | 771.47           |
| delA+ALo_22h_a       | FA1090<br>rnhA+nicsPlac::rnhA 0.005<br>mM IPTG 22 hrs      | 1     | 6a         | SRR9670501    | SAMN12255014        | 9895    | 7853573 | 793.69           |
| delA+ALo_22h_b       | FA1090<br>rnhA+nicsPlac::rnhA 0.005<br>mM IPTG 22 hrs      | 2     | 5b         | SRR9670528    | SAMN12255027        | 11280   | 8595019 | 761.97           |
| delA+AHi_22h_a       | FA1090<br>rnhA+nicsPlac::rnhA 1 mM<br>IPTG 22 hrs          | 1     | 7a         | SRR9670502    | SAMN12255015        | 9574    | 7586886 | 792.45           |
| delA+AHi_22h_b       | FA1090<br>rnhA+nicsPlac::rnhA 1 mM<br>IPTG 22 hrs          | 2     | 6b         | SRR9670525    | SAMN12255028        | 8330    | 6565278 | 788.15           |
| delA+A-<br>10mut_32h | FA1090<br>rnhA+nicsPlac::rnhA garP-<br>10 0 mM IPTG 32 hrs |       | 8b         | SRR9670529    | SAMN12255030        | 10573   | 8253947 | 780.66           |

**Supplemental Table 2.** PacBio samples numbers

The strains analyzed in this study along with their read statistics and accession numbers. Reads can be accessed under the SRA project SRP214219 with the Bioproject accession number PRJNA553228.

|                                                                            |                            |
|----------------------------------------------------------------------------|----------------------------|
| <i>recA6</i> FA1090                                                        | (Seifert 1997)             |
| FA1090                                                                     | Lab strain                 |
| <i>garP</i> <sub>-10</sub> <i>recA6</i> FA1090                             | (Cahoon and Seifert 2013)  |
| <i>garP</i> <sub>-35</sub> <i>recA6</i> FA1090                             | (Cahoon and Seifert 2013)  |
| 82sRNA <i>recA6</i> FA1090                                                 | This study                 |
| 72sRNA FA1090                                                              | This study                 |
| 32sRNA FA1090                                                              | This study                 |
| <i>recQ/rep recA6</i> FA1090                                               | (Cahoon and Seifert, 2009) |
| G4mutant <i>recA6</i> FA1090                                               | This study                 |
| G4mutant FA1090                                                            | This study                 |
| <i>rnhA+nicsP</i> <sub>lac</sub> :: <i>rnhA</i> FA1090                     | This study                 |
| <i>rnhA+nicsP</i> <sub>lac</sub> :: <i>rnhA garP</i> <sub>-10</sub> FA1090 | This study                 |
| <i>garP</i> <sub>-10</sub> FA1090                                          | This study                 |
| <i>garP</i> <sub>-35</sub> FA1090                                          | This study                 |

**Supplemental Table 3.** Strains used in this study

Descriptions of how each strain was constructed can be found in the methods.

Supplemental Table 4. Primers used in this study

|                     |                                                                                                                                                                                                                                                                                                                                                                                                                                                                                                                                               |
|---------------------|-----------------------------------------------------------------------------------------------------------------------------------------------------------------------------------------------------------------------------------------------------------------------------------------------------------------------------------------------------------------------------------------------------------------------------------------------------------------------------------------------------------------------------------------------|
| rnhA-usF            | GTCCGCAGCCCATATCC                                                                                                                                                                                                                                                                                                                                                                                                                                                                                                                             |
| rnhA-dsR            | TCGCATACCGGATAAGGGC                                                                                                                                                                                                                                                                                                                                                                                                                                                                                                                           |
| rnhAusR-NotI        | TGTCGGTGCGGCAATCAGCGGCCGCATCGTGCCTTTGTGTGGTG                                                                                                                                                                                                                                                                                                                                                                                                                                                                                                  |
| rnhAdsF-NotI        | CACCACACAAAGGCACGATGCGGCCGCTGATTGCCGCACCGACA                                                                                                                                                                                                                                                                                                                                                                                                                                                                                                  |
| rnhAF-PaI           | GGCttaattaaATGGACACACCCGTTTACC                                                                                                                                                                                                                                                                                                                                                                                                                                                                                                                |
| rnhAr-PmeI          | GGCgtttaaacTCGCATACCGGATAAGGGC                                                                                                                                                                                                                                                                                                                                                                                                                                                                                                                |
| R2usF               | GAAGACAACGCCGATATGCG                                                                                                                                                                                                                                                                                                                                                                                                                                                                                                                          |
| R2dsR               | TGCTGAAGCACCAAGCGAAC                                                                                                                                                                                                                                                                                                                                                                                                                                                                                                                          |
| R2usRkpnI           | ACGGCATTTTTGTGCCGTTTAggtaccCGCACCGATGTGTTTATTTTCG                                                                                                                                                                                                                                                                                                                                                                                                                                                                                             |
| R2dsFkpnI           | CGAAATAAACACATCGGTGCGggtaccTAAACCGGCACAAAAATGCCGT                                                                                                                                                                                                                                                                                                                                                                                                                                                                                             |
| R2FPaI              | GGTttaattaaATGCCGTCTGAAACCATTTTC                                                                                                                                                                                                                                                                                                                                                                                                                                                                                                              |
| R2dsRFseI           | GGTggccggccTGCTGAAGCACCAAGCGAAC                                                                                                                                                                                                                                                                                                                                                                                                                                                                                                               |
| RT-rnhAF2           | CGTCATCATCTGCACCGACT                                                                                                                                                                                                                                                                                                                                                                                                                                                                                                                          |
| RT-rnhAR2           | TCTTGCCACAAGTCGTCGTT                                                                                                                                                                                                                                                                                                                                                                                                                                                                                                                          |
| RTG4-3F             | AAATCGGCACGAATCTTGCTT                                                                                                                                                                                                                                                                                                                                                                                                                                                                                                                         |
| RTG4-3R             | TCAGCTCGATAAGGGTAAAGCC                                                                                                                                                                                                                                                                                                                                                                                                                                                                                                                        |
| 32nt sRNA<br>gBlock | <p>ATACTTAATTAAGCATAGAAACACCACGCGCCGATTTCAAATGCTTTCCAAGA<br/> AAACGGAGCGAGTCGAAAAAAAAAGCCCGCTCATTAGGCGGGCAACTGTGTGT<br/> TTTTTAAAAATAAAAAATTTCCCAACCAACCCACCTATTCTAACGCGTAAA<br/> TTCAAAAATCTCAAATTCGACCCAATCAACACACCCGATACCCCATGCCAATA<br/> AAAAAGTAACGAAAATCGGCACTAAAAGTACAATTTTCGACACTGCCGCCCC<br/> CTACTTCCGCAAACCAACCCACCTAAAAGAAAATACAAAATAAAAAAATTA<br/> TATAGAGATAAACGCATAAAATTTACCTCAAACATAAAATCGGCACGAATC<br/> TTGCTTTATAATACGCAGTTGTCGCAACAAAAAACCAGTGGTTAAATACATTG<br/> CATGATGCCGATGGCGTAAGCCTGAGGCATTTCCCTTTTCGCCGTCTGAACC</p>  |
| 72nt sRNA<br>gBlock | <p>ATACTTAATTAAGCATAGAAACGAGTCGAAAAAAAAAGCCCGCTCATTAGGCG<br/> GGCAACTGTGTGTTACCACGCGCCGATTTCAAATGCTTTCCAAGAAAACGGAG<br/> CTTTTTAAAAATAAAAAATTTCCCAACCAACCCACCTATTCTAACGCGTAAA<br/> TTCAAAAATCTCAAATTCGACCCAATCAACACACCCGATACCCCATGCCAATA<br/> AAAAAGTAACGAAAATCGGCACTAAAAGTACAATTTTCGACACTGCCGCCCC<br/> CTACTTCCGCAAACCAACCCACCTAAAAGAAAATACAAAATAAAAAAATTA<br/> TATAGAGATAAACGCATAAAATTTACCTCAAACATAAAATCGGCACGAATC<br/> TTGCTTTATAATACGCAGTTGTCGCAACAAAAAACCAGTGGTTAAATACATTG<br/> CATGATGCCGATGGCGTAAGCCTGAGGCATTTCCCTTTTCGCCGTCTGAACC</p> |

|                     |                                                                                                                                                                                                                                                                                                                                                                                                                                                                                                                                                                                                                                                                                                                                                                                                                                                                                                                                                                                                                                                                       |
|---------------------|-----------------------------------------------------------------------------------------------------------------------------------------------------------------------------------------------------------------------------------------------------------------------------------------------------------------------------------------------------------------------------------------------------------------------------------------------------------------------------------------------------------------------------------------------------------------------------------------------------------------------------------------------------------------------------------------------------------------------------------------------------------------------------------------------------------------------------------------------------------------------------------------------------------------------------------------------------------------------------------------------------------------------------------------------------------------------|
| 84nt sRNA<br>gBlock | <p>ATATTAATTAAGAGTCGAAAAAAAAAGCCCGCTCATTAGGCGGGCAACTGTGT<br/> GTTGCATAGAAACACCACGCGCCGATTTCAAATGCTTTCCAAGAAAACGGAGC<br/> TTTTTAAAAAATAAAAAATTCACCAACCAACCCACCTATTCTAACGCGTAAAT<br/> TCAAAAATCTCAAATTCGGACCCAATCAACACACCCGATACCCCATGCCAATAA<br/> AAAAGTAACGAAAATCGGCACTAAAAGTACAATTTTCGACACTGCCGCCCTT<br/> CAGACGGCGGTACCACCCACCTAAAAGAAAATACAAAATAAAAACAATTATA<br/> TAGAGATAAACGCATAAAATTTACCTCAAACATAAAATCGGCACGAATCTT<br/> GCTTTATAATACGCAGTTGTCGCAACAAAAAACCGATGGTTAAATACATTGCA<br/> TGATGCCGATGGCGTAAGCCTGAGGCATTTCCCTTTCAATTAGGAGTAATTT</p>                                                                                                                                                                                                                                                                                                                                                                                                                                                                                                                      |
| 16sF1               | GGAGACGGAGGAGTGCCTC                                                                                                                                                                                                                                                                                                                                                                                                                                                                                                                                                                                                                                                                                                                                                                                                                                                                                                                                                                                                                                                   |
| 16sR1               | CGCTCGTTGCGGGACTTAAC                                                                                                                                                                                                                                                                                                                                                                                                                                                                                                                                                                                                                                                                                                                                                                                                                                                                                                                                                                                                                                                  |
| USaspcF1            | GTCCGGTCCCGAGCAATACA                                                                                                                                                                                                                                                                                                                                                                                                                                                                                                                                                                                                                                                                                                                                                                                                                                                                                                                                                                                                                                                  |
| USaspcR1            | TAGCCTGCCGATGGCGTAA                                                                                                                                                                                                                                                                                                                                                                                                                                                                                                                                                                                                                                                                                                                                                                                                                                                                                                                                                                                                                                                   |
| RT-G4-start         | GGGTTGGGTGGGGAATTTTT                                                                                                                                                                                                                                                                                                                                                                                                                                                                                                                                                                                                                                                                                                                                                                                                                                                                                                                                                                                                                                                  |
| RT-mid-For          | GCTTTCCAAGAAAACGGAGC                                                                                                                                                                                                                                                                                                                                                                                                                                                                                                                                                                                                                                                                                                                                                                                                                                                                                                                                                                                                                                                  |
| RT-Term-For         | ATCTTGCAATGTAACATCAGAG                                                                                                                                                                                                                                                                                                                                                                                                                                                                                                                                                                                                                                                                                                                                                                                                                                                                                                                                                                                                                                                |
| KanFor              | ATGGCTCATAACCCCTTG                                                                                                                                                                                                                                                                                                                                                                                                                                                                                                                                                                                                                                                                                                                                                                                                                                                                                                                                                                                                                                                    |
| lctpout1F1          | catcatcgcgtatgtaccg                                                                                                                                                                                                                                                                                                                                                                                                                                                                                                                                                                                                                                                                                                                                                                                                                                                                                                                                                                                                                                                   |
| LacPFor             | gaggcgataacaattcaca                                                                                                                                                                                                                                                                                                                                                                                                                                                                                                                                                                                                                                                                                                                                                                                                                                                                                                                                                                                                                                                   |
| garP-10             | <p>TGAACCAACTGCCACCTAAGGCAAATTAGGCCTTAAATTTCAAATAAATCAAA<br/> CGGTAAGTGATTTTCCACGCGCCCGGATCAACCCGGGCGGCTTGTCTTTTA<br/> AGGGTTTGCAAGGCGGGCGGGGTGTCGCTTCCGAAGCCATCCTTTTGCCG<br/> AAGGTCAAAAATCAGCCGTTACCGGGTATTGCCGAATCACGGCATATGGCC<br/> GGAAAACCTCGTCATTCCCGCGAAAGCGGGAATCTAGGTCTGTCGGCACGGA<br/> AACTTATCGGGTAAAAAGGTTTCTCCGGTCTGAGTCTGGATTCCCCTTTTCG<br/> TGGGAATGACGGGATTTAATGATGCCGCCGGCAACGAAAAAATCGAAACAA<br/> GCACCTGCCGTCAACCTGCCGCGACGCTTCATCTGCCGTTGCATAGAAACAC<br/> CACGCGCCGATTTCAAATGCTTTCCAAGAAAACGGAGCTTTTTAAAAAATAAA<br/> AAATTccccacccaaccacccTggacggACGCGTAAATTCAAAAATCTCAAATTCG<br/> ACCCAATCAACACACCCGATACCCCATGCCAATAAAAAAGTAACGAAAAATCGG<br/> CACTAAAACACTGACAATTTTCGACACTGCCGCCCTACTTCCGCAAACCCACACC<br/> CACCTAAAAGAAAATACAAAATAAAAACAATTATATAGAGATAAACGCATAA<br/> AATTTACCTCAAACATAAAATCGGCACGAATCTTGCTTTATAATACGCAgTT<br/> GTCGCAACAAAAAACCGATGGTTAAATACATTGCATGATGCCGATGGCGTAA<br/> GCCTGAGGCATTTCCCTTTCAATTAGGAGTAATTTTATGAATACCCTTCAAAA<br/> AGGCTTACCCTTATCGAGCTGATGATTGTGATCGCTATCGTCGGCATTGTCG<br/> GGCAGTCGCCCTTCCCGCCTACCAAGACT</p> |

|              |                                                                                                                                                                                                                                                                                                                                                                                                                                                                          |
|--------------|--------------------------------------------------------------------------------------------------------------------------------------------------------------------------------------------------------------------------------------------------------------------------------------------------------------------------------------------------------------------------------------------------------------------------------------------------------------------------|
| G4mut gBlock | ATACTTAATTAAGCATAGAAACACCACGCGCCGATTTCAAATGCTTTCCAAGA<br>AAACGGAGCTTTTTAAAAAATAAAAAATTCCCCACCACACCCCACTATTCTAA<br>CGCGTAAATTCAAAAATCTCAAATTCGACCCAATCAACACACCCGATACCCC<br>ATGCCAATAAAAAAGTAACGAAAATCGGCACTAAAAGTACAATTTTCGACAC<br>TGCCGCCCCCTACTTCCGCAAACCACCCACCTAAAAGAAAATACAAAATAA<br>AAACAATTATATAGAGATAAACGCATAAAATTTACCTCAAACATAAAATCG<br>GCACGAATCTTGCTTTATAATACGCAGTTGTCGCAACAAAAACCGATGGTTA<br>AATACATTGCATGATGCCGATGGCGTAAGCCTGAGGCATTTCCCTTTGCGCG<br>TCTGAACC |
|--------------|--------------------------------------------------------------------------------------------------------------------------------------------------------------------------------------------------------------------------------------------------------------------------------------------------------------------------------------------------------------------------------------------------------------------------------------------------------------------------|

**Supplemental Table 4.** Primers used in this study

Primers and gBlocks were used to construct strains or in quantitative PCR assays to quantify DNA.

Supplemental Table 5. Primers used for PacBio Sequencing

| Barcodes for PacBio Sequencing |                                    |               |                                     | Strain                                                |
|--------------------------------|------------------------------------|---------------|-------------------------------------|-------------------------------------------------------|
| bc1002pilRBS                   | ACACACAGACTGTGAGTttcccttcaattaggag | bc1002opaeRev | ACACACAGACTGTGAGgggttccgggcggtgttcc | FA1090                                                |
| bc1010pilRBS                   | ACGCGCTATCTCAGAGTttcccttcaattaggag | bc1010opaeRev | ACGCGCTATCTCAGAGgggttccgggcggtgttcc | <i>rnhA+nicsP<sub>lac</sub>::rnhA</i> 0.005 mm IPTG   |
| bc1011pilRBS                   | CTATACGTATATCTATttcccttcaattaggag  | bc1011opaeRev | CTATACGTATATCTATgggttccgggcggtgttcc | <i>rnhA+nicsP<sub>lac</sub>::rnhA</i> 1 mm IPTG       |
| bc1012pilRBS                   | ACACTAGATCGCGTGTttcccttcaattaggag  | bc1012opaeRev | ACACTAGATCGCGTGTgggttccgggcggtgttcc | <i>rnhA+nicsP<sub>lac</sub>::rnhA</i> 0 mm IPTG       |
| bc1027pilRBS                   | CTCACACTCTCTCACAttcccttcaattaggag  | bc1027opaeRev | CTCACACTCTCTCACAggttccgggcggtgttcc  | 72nt <i>gar</i>                                       |
| bc1028pilRBS                   | CTCTGCTCTGACTCTttcccttcaattaggag   | bc1028opaeRev | CTCTGCTCTGACTCTCgggttccgggcggtgttcc | 32nt <i>gar</i>                                       |
| bc1049pilRBS                   | ACACGTGTGCTCTCTttcccttcaattaggag   | bc1049opaeRev | ACACGTGTGCTCTCTCgggttccgggcggtgttcc | FA1090 <i>garP</i> <sub>-35</sub>                     |
| bc1006pilRBS                   | CATATATATCAGCTGTttcccttcaattaggag  | bc1006opaeRev | CATATATATCAGCTGTgggttccgggcggtgttcc | FA1090 <i>garP</i> <sub>-10</sub>                     |
| bc1009pilRBS                   | ACACACGCGAGACAGAttcccttcaattaggag  | bc1009opaeRev | ACACACGCGAGACAGAggttccgggcggtgttcc  | FA1090                                                |
| bc1015pilRBS                   | CGCATGACACGTGTGTttcccttcaattaggag  | bc1015opaeRev | CGCATGACACGTGTGTgggttccgggcggtgttcc | <i>rnhA+nicsP<sub>lac</sub>::rnhA</i> 0.005 mm IPTG   |
| bc1016pilRBS                   | CATAGAGAGATAGTATttcccttcaattaggag  | bc1016opaeRev | CATAGAGAGATAGTATgggttccgggcggtgttcc | <i>rnhA+nicsP<sub>lac</sub>::rnhA</i> 1 mm IPTG       |
| bc1018pilRBS                   | TCACGTGCTCACTGTGttcccttcaattaggag  | bc1018opaeRev | TCACGTGCTCACTGTGgggttccgggcggtgttcc | <i>rnhA+nicsP<sub>lac</sub>::rnhA</i> 0 mm IPTG       |
| bc1019pilRBS                   | ACACACTCTATCAGATttcccttcaattaggag  | bc1019opaeRev | ACACACTCTATCAGATgggttccgggcggtgttcc | <i>rnhA+nicsPlac::rnhA garP</i> <sub>-10</sub> 0 IPTG |
| bc1020pilRBS                   | CACGACACGACGATGTttcccttcaattaggag  | bc1020opaeRev | CACGACACGACGATGTgggttccgggcggtgttcc | FA1090 <i>garP</i> <sub>-35</sub>                     |
| bc1032pilRBS                   | GAGACTAGAGATAGTttcccttcaattaggag   | bc1032opaeRev | GAGACTAGAGATAGTgggttccgggcggtgttcc  | 72nt <i>gar</i>                                       |
| bc1033pilRBS                   | TCTCGTCGAGTCTTttcccttcaattaggag    | bc1033opaeRev | TCTCGTCGAGTCTTgggttccgggcggtgttcc   | 32nt <i>gar</i>                                       |
| bc1040pilRBS                   | TGTCATATGAGAGTGTttcccttcaattaggag  | bc1040opaeRev | TGTCATATGAGAGTGTgggttccgggcggtgttcc | FA1090 G4 mutant                                      |

Supplemental Table 5. Primers used for PacBio Sequencing

Primers were used to amplify the *pilE* gene to test antigenic variation frequencies and different barcodes were used for each strain as listed in the table.
